# Supplementary material
Source: MDPI journal article supplement (https://www.mdpi.com/2071-1050/10/12/4470)
Supplement: s1 [file s1]

## Supplementary Information S1.

### References for publications used in the study.

1. Arduini, I., Masoni, A., Ercoli, L., Mariotti, M., 2006. Grain yield, and dry matter and nitrogen accumulation and remobilization in durum wheat as affected by variety and seeding rate. *Eur. J. Agron.* 25, 309–318.
2. Cai, R., Li, Y., Zhang, M., Guo, L., Wang, W., Zhou, Y., 2014. Effects of nitrogen fertilizer rates on nitrogen accumulation and translocation after anthesis in wheat under rain-fed and irrigated conditions. *J. Trit. Crops.* 34, 351–357 (in Chinese).
3. Cai, R., Zhang, D., Zhang, M., Li, R., Wang, W., 2014. Effects of nitrogen application rate grain yield of winter wheat under on dry matter accumulation and irrigated and rainfed conditions. *J. Trit. Crops.* 34, 194–202 (in Chinese).
4. Cai, Y., Hao, M., 2013. Effects of long-term nitrogen fertilization on wheat in Loess Plateau. *J. Trit. Crops.* 33(5), 983–987 (in Chinese).
5. Cai, Y., Hao, M., 2015. Effects of rotation model and period on wheat yield, nutrient uptake and soil fertility in the Loess Plateau. *Plant Nutr Fer Sci.* 21, 864–872 (in Chinese).
6. Cao, H., Wang, Z., Shi, Y., Du, M., Lei, X., Zhang, W., Zhang, L., Pu, Y., 2014. Optimization of nitrogen fertilizer recommendation technology based on soil test for winter wheat on Weibei Dryland. *Sci Agric Sin.* 47, 3826–3838 (in Chinese).
7. Cao, H., Yao, Z., 2005. Application effect of plant cytodeme regulator” Tianda-2116” on dryland winter wheat in the east of Gansu province. *Acta Agr Boreali Sin.* 14, 35–38 (in Chinese).
8. Cao, HH., Wang, Z., Zhao, H., Ma, X., She, X., Zhang, L., 2017. Yield based evaluation on fertilizer application and analysis of its reduction potential in Weibei Dryland wheat production. *Sci Agric Sin.* 50, 2758–2768 (in Chinese).
9. Chai, S., Yang, C., Zhang, S., Chen, H., Chang, L., 2015. Effects of plastic mulching modes on soil moisture and grain yield in dryland winter wheat. *Acta Agron Sin.* 41, 787–796 (in Chinese).
10. Chang, L., Chai, S., Yang, D., Lv, Q., 2010. Variation analysis on the grain yield and main agronomic traits of spring wheat in rainfed regions of China. *Chin. J. Appl. Ecol.* 21, 2821–2829 (in Chinese).
11. Chen, H., Chai, S., Chen, Y., Fan, Y., Huang, C., Chang, L., Yang, C., 2015. Effect of mulching method on soil temperature and grain yield of spring wheat in rainfed agricultural areas of northwestern China. *Acta Ecol Sin.* 35, 6316–6325 (in Chinese).
12. Chen, L., Zhou, B., 1995. Effect of fertilization on root development, root metabolism of spring wheat and the mechanism of fertilization on soil water utilization. *Plant Nutr Fer Sci.* 1, 26–32 (in Chinese).
13. Chen, M., Gao, Z., Sun, M., Ren, A., Deng, Y., 2015. Effect of phosphorus application under tillage in fallow period on nitrogen absorption and translocation in dryland wheat. *J. Trit. Crops.* 35, 1569–1575 (in Chinese).
14. Chen, M., Gao, Z., Sun, M., Yang, Z., 2017. Effect of different tillage systems during fallow period on soil water, nutrient content and wheat yield in dryland. *J. Trit. Crops.* (5): 680–686 (in Chinese).

15. Chen, M., Sun, M., Gao, Z., Ren, A., Yang, Z., Hao, X., 2016. Effects of mulching during fallow period on soil water storage and consumption and its relationship with wheat yield of dryland. *Sci Agric Sin.* 49, 2572–2582 (in Chinese).
16. Chen, S., Sun, Y., Zhang, S., 2014. Study on the grain filling characteristics of dryland winter wheat varieties in the replacement process at different eras. *J. Trit. Crops.* 34(6), 774–781 (in Chinese).
17. Chen, Y., Liu, T., Tian, X., Wang, X., Li, M., Wang, S., Wang, Z., 2015. Effects of plastic film combined with straw mulch on grain yield and water use efficiency of winter wheat in loess plateau. *Field Crop Res.* 172, 53–58.
18. Chun-Xi, L.I., Shou-Chen, M.A., Shao, Y., Shou-Tian, M.A., Zhang, L.L., 2018. Effects of long-term organic fertilization on soil microbiologic characteristics, yield and sustainable production of winter wheat. *J. Integr. Agric.* 17, 210–219.
19. Cui, H., Jing, H., Zhao, H., Zhang, J., Wang, J., 2006. Ecological effects of black fluid-film mulched over in dry land winter wheat. *Chin. J. Eco-Agr.* 14, 73–75 (in Chinese).
20. Cui, H., Zhang, S., Yan, C., Jing, H., Ma, A. 2003. Simulation study on optimal dept of soil storage capacity for rainfed wheat on Loess Plateau. *Journal of Soil and Water Conservation*, 17, 110–112 (in Chinese).
21. Cui, K., Gao, Z., Sun, M., Zhao, W., Deng, Y., Li, Q., 2014. Effect of deep plowing and plastic film mulching in fallow period on soil water storage and wheat grain yield and quality. *Agr Res Arid Area.* 32, 78–84 (in Chinese).
22. Dang, J., Pei, X., Zhang, D., Wang, J., Zhang, J., Wu, X., 2016. Effects of deep plowing time during the fallow period on water storage-consumption characteristics and wheat yield in dry-land soil. *Chin. J. Appl. Ecol.* 27, 2975–2982 (in Chinese).
23. Dang, T., Cai, G., Guo, S., Hao, M., Heng, L.K., 2006. Effect of nitrogen management on yield and water use efficiency of rainfed wheat and maize in northwest china. *Pedosphere* 16, 495–504.
24. Dang, T., Cai, G., Guo, S., Hao, M., Wang, B., 2003. Study on nitrogen efficiencies of dry land wheat by <sup>15</sup>N labeled fertilizer. *J Nucl Agric Sci.* 17, 280–285 (in Chinese).
25. Dang, T., Guo, D., Qi, L., 2008. Effects of wheat yield and water use under dual-mulching mode of plastic film and straw in the dryland farming. *Transactions of the CSAE* 24, 20–24 (in Chinese).
26. Deng, X., Shan, L., Dao, Y., 2002. High efficient use of limited supplement water by dryland spring wheat. *Transactions of the CSAE*, 18, 84–91 (in Chinese).
27. Deng, Y., Gao, Z., Sun, M., Zhao, W., Zhao, H., Li, Q., 2014. Effects of deep plowing and mulch in fallow period on soil water and yield of wheat in dryland. *Chin. J. Appl. Ecol.* 25, 132–138 (in Chinese).
28. Diao, C., Wang, Z., Li, S., Liu, L., Huang, N., 2018. Differences in grain nitrogen contents of high-yielding wheat cultivars and relation to NPK uptake and utilization in drylands. *Plant Nutr Fer Sci.* 24, 285–295 (in Chinese).
29. Dong, Q., Yang, Y., Yu, K., Feng, H., 2018. Effects of straw mulching and plastic film mulching on improving soil organic carbon and nitrogen fractions, crop yield

- and water use efficiency in the Loess Plateau, China. *Agric. Water Manage.* 201, 133–143.
30. Dong, Y., Zhang, J., 1993. Effect of centralized fertilization with furrow sowing on yield and yield of dryland wheat. *J. Trit. Crops.* 5, 35–37 (in Chinese).
  31. Duan, W., Yu, Z., Shi, Y., Zhang, Y., Zhao, J., 2013. Effects of nitrogen application depth on water consumption characteristics and dry matter accumulation and distribution in rainfed wheat. *Acta Agron Sin.* 39, 657–664 (in Chinese).
  32. Duan, W., Yu, Z., Zhang, Y., Wang, D., Shi, Y., 2012. Effects of nitrogen application rate on water consumption characteristics and grain yield in rainfed wheat. *Acta Agron Sin.* 38, 1657–1664 (in Chinese).
  33. Duan, W., Yu, Z., Zhang, Y., Wang, D., Shi, Y., 2012. Effects of nitrogen fertilizer application rate on nitrogen absorption, translocation and nitrate nitrogen content in soil of dryland wheat. *Sci Agr Sin.* 15, 3040–3048 (in Chinese).
  34. Fan, G., Li, J., Wang, X., Zheng, T., Guo, X., Chen, Y., Wu, Z., Yang, W., 2012. *Acta Agron Sin.* 38, 1307–1317 (in Chinese).
  35. Fan, T., Song, S., Xu, Y., Li, X., 2007. Relationship of canopy temperature with grain yield and water use efficiency in various genotypes of dryland winter wheat during grain filling stage. *Acta Ecol Sin.* 27, 4491–4497 (in Chinese).
  36. Fan, T., Zhou, G., Wang, Y., Ding, N., Gao, Y., Wang, S., 2004. Long-term fertilization on yield increase of winter wheat-maize rotation system in Loess Plateau dryland of Gansu. *Plant Nutr Fer Sci.* 10, 127–131 (in Chinese).
  37. Fan, Y., Chai, S., Chen, H., Chen, Y., Yang, C., Huang, C., Chang, L., Pang, L., 2013. Effects of mulching on soil moisture in a dryland winter wheat field, Northwest China. *Chin. J. Appl. Ecol.* 24, 3137–3144 (in Chinese).
  38. Fang, Q., Zhang, X., Shao, L., Chen, S., Sun, H., 2018. Assessing the performance of different irrigation systems on winter wheat under limited water supply. *Agric. Water Manage.* 196, 133–143.
  39. Fang, R., Tong, Y., Liang, D., 2004. Comprehensive effects of different mulching materials on winter wheat productions in Weibei highland. *Transactions of the CSAE* 20, 72–75 (in Chinese).
  40. Fang, Y., Xu, B., Liu, L., Gu, Y., Liu, Q., Turner, N.C., Li, F., 2014. Does a mixture of old and modern winter wheat cultivars increase yield and water use efficiency in water-limited environments?. *Field Crop Res.* 156, 12–21.
  41. Feng, M., Xiaio, L., Yang, W., Ding, G., 2010. Predicting grain yield of irrigation-land and dry-land winter wheat based on remote sensing data and meteorological data. *Transactions of the CSAE* 26, 183–188 (in Chinese).
  42. Feng, q., Liu R., 1994. High yield and yield stability of new dry land wheat varieties in the Middle Area of Shanxi Province. *Acta Agr. Boreali-Sin.* 9, 46–48 (in Chinese).
  43. Freyman, S., Palmer, C. J., Yan, S., 1983. Yield trend of long-term rotation of Dryland Wheat. *J. Trit. Crops.* 5, 27–31 (in Chinese).
  44. Fu, W., Fan, J., Hu, Y., Zhao, J., Hao, M., 2017. Effects of fertilization and film mulching on soil physical and chemical properties and winter wheat yield on the Loess Plateau. *Plant Nutr Fer Sci.* 23, 1158–1167 (in Chinese).

45. Gao, H., Guo, S., Liu, W., Che, S., 2009. Effects of fertilization on wheat yield and soil organic carbon accumulation in rainfed loessal tablelands. *Plant Nutr Fer Sci.* 15, 1333–1338 (in Chinese).
46. Gao, Y., Li, S., 2005. Cause and mechanism of crop yield reduction under straw mulch in dryland. *Transactions of the CSAE* 21, 15–19 (in Chinese).
47. Gao, Y., Sun, M., Cui, K., Zhao, H., Yang, Z., Hao, X., 2015. Effects of mulching on grain yield and water use efficiency of dryland wheat in different rainfall years. *Sci Agric Sin.* 48, 3589–3599 (in Chinese).
48. Gao, Y., Sun, M., Gao, Z., Ren, A., Zhao, H., Li, G., Yang, Z., Zong, Y., Hao, X., 2014. Regulatory effects of mulching in fallow period and phosphorus fertilization on soil reservoir of dryland wheat. *Chin. J. Eco-Agr.* 22, 1139–1145 (in Chinese).
49. Gao, Y., Wang, Y., Fan, T., Wang, L., 2007. Studies on the drought-resistance of dryland winter wheat based on soil-stored water before sowing. *Chin. J. Eco-Agr.* 1, 59–62 (in Chinese).
50. Gao, Y., Yang, J., Chen, L., Zhu, G., Ze, X., Liu, W., Li, S., 2007. Effect of cultivation methods, N fertilizer rate and winter wheat planting density on soil water utilization in dryland. *Agr Res Arid Area.*, 25, 45–50 (in Chinese).
51. Gou, S., Wang, C., Feng, Y., 1999. Analysis of main agronomic characters of dry land hybrid wheat. *Agr Res Arid Area.*, 17, 1–5 (in Chinese).
52. Guo, S., Dang, T., Hao, M., 2005. Effects of Fertilization on Wheat Yield,  $\text{NO}_3\text{-N}$  Accumulation and Soil Water Content in Semi-Arid Area of China. *Sci Agric Sin.* 38, 754–760 (in Chinese).
53. Guo, S., Gao, H., Dang, T., 2009. Effects of nitrogen application rates on grain yield, soil organic carbon and nitrogen under a rainfed cropping system in the loess tablelands of China. *Plant Nutr Fer Sci.* 15, 808–814 (in Chinese).
54. Guo, Y., Gao, Z., Sun, M., Ren, A., Zhao, H., Li, G., 2014. Effects of mulching in fallow period and nitrogen application amount on water and nitrogen use efficiency and grain yield in dryland wheat. *J. Trit. Crops.* 34, 1398–1405 (in Chinese).
55. Guo, Z., Diao, P., 1999. Study on high yield cultivation techniques of dry mulched winter wheat with plastic mulching in whole growth period. *Transactions of the CSAE* 15, 222–224 (in Chinese).
56. Guo, Z., Liu, G., Li, C., Gao, Y., 2014. Fertilizer effects of whole plastic-film mulching combined with soil overlying and bunch planting of dry-land wheat. *Agr Res Arid Area.* 32, 163–168 (in Chinese).
57. Han, J., Liao, Y., Jia, Z., Han, Q., Ding, R., 2014. Effects of Ridging with Mulching on Yield and Water Use Efficiency in Winter Wheat in Semi-humid Drought-Prone Region in China. *Acta Agron Sin.* 40, 101–109 (in Chinese).
58. Han, J., Yang, Q., Zhou, Y., Wang, W., Li, Y., 2010. Effect of zinc fertilizer on the accumulation of dry matter and yield of winter wheat in dry land. *J. Trit. Crops.* 30, 358–361 (in Chinese).
59. Hao, M., Lai, L., Wang, G., Dang, T., 2003. Effects of long-term fertilization on wheat yield on Loess Plateau. *Chin. J. Appl. Ecol.* 14, 1893–1896 (in Chinese).
60. Hao, M., Wang, X., Dang, T., Li, L., Gao, C., 2004. Analysis of long-term fertilization effect on yield of wheat in dry land on Loess Plateau. *Acta Agron*

Sin. 30, 1108–1112 (in Chinese).

61. He, G., Wang, Z., Li, F., Dai, J., Li, Q., Xue, C., Wang, S., Liu, H., 2016. Nitrogen, phosphorus and potassium requirement and their physiological efficiency for winter wheat affected by soil surface managements in dryland. *Sci Agric Sin.* 49, 1657–1671 (in Chinese).
62. He, H., Bao, M., Ma, X., Yu, H., He, G., Qiu, W., 2018. Effects of cultivation patterns on wheat yield and grain nutrient concentration in dryland. *Chin. J. Appl. Ecol.* 29, 818–826 (in Chinese).
63. He, L., Zhang, W., Zhang, Y., Cao, C., Li, K., Du, X., 2014. Water utilization and matter production in winter wheat under soil-coated ultrathin plastic-film mulching and irrigation management. *Acta Agron Sin.* 40, 1980–1989 (in Chinese).
64. He, X., Hao, M., Li, H., Cai, Z., 2010. Effects of different fertilization on yield of wheat and water and fertilizer use efficiency in the Loess Plateau. *Plant Nutr Fer Sci.* 16, 1333–1340 (in Chinese).
65. Hou, F., Zhang, R., Sun, Y., Zhang, C., Liu, M., Zhang, J., Sun, X., Hao, J., 2017. Effect of sprinkling irrigation at different growth stages on the yield and grain quality of dry-land wheat in Weibei. *J. Trit. Crops.* 37, 543–547 (in Chinese).
66. Hou, H., Lv, J., Guo, T., Zhang, G., Dong, B., Zhang, X., 2014. Effects of whole field soil-plastic mulching on spring wheat water consumption, yield, and soil water balance in semiarid region. *Sci Agric Sin.* 47, 4392–4404 (in Chinese).
67. Hou, X., Li, R., Jia, Z., Han, Q., Wang, W., Yang, B., 2012. Effects of rotational tillage practices on soil properties, winter wheat yields and water-use efficiency in semi-arid areas of North-west China. *Field Crop Res.* 129, 7–13.
68. Hu, T., Tong, Y., Gao, P., Ju, X., 2014. N<sub>2</sub>O emission characteristics and mitigation methods in South Loess Plateau under rain-fed winter wheat conditions. *Chin. J. Eco-Agr.* 22, 1038–1046 (in Chinese).
69. Hu, Y., Hao, M., Wang, Z., Fu, W., 2017. Effect of long-term fertilization on winter wheat yield from the dry land under different precipitation patterns. *Chin. J. Appl. Ecol.* 28, 135–141 (in Chinese).
70. Hua, T., Li, C., Zhao, B., Li, H., Zhou, J., 1992. Effect of different fertilizer structure on soil water production efficiency of water of dry land. *Acta Agr Boreali Sin.* 1, 57–62 (in Chinese).
71. Huang, D., Gu, J., Fang, R., 1995. Simulation experiment of precipitation at different growth stages of wheat in Weibei Rainfed Highland, Shaanxi. *J. Trit. Crops.* 4, 40–41 (in Chinese).
72. Huang, G., Guo, Q., Zhang, R., Pang, L., Li, G., Chen, K.Y., Yu, A., 2006. Effects of conservation tillage on soil moisture and crop yield in a phased rotation system with spring wheat and field pea in dryland. *Acta Ecol Sin.* 26(4), 1176–1185 (in Chinese).
73. Huang, L., Liu, Y., Lin, Q., Li, J., 2009. Effect of supplemental irrigation on nitrogen translation and high-yield wheat yield in drylands. *Chin. J. Eco-Agr.* 17, 905–908 (in Chinese).
74. Huang, M., Dang, T., Gallichand, J., Goulet, M., 2003. Effect of increased fertilizer applications to wheat crop on soil-water depletion in the Loess Plateau, China.

Agric. Water Manage. 58, 267–278.

75. Huang, M., Jin, F., 1999. Effects of film dropping on hill of the growth and yield of arid winter wheat. *Chin. J. Eco-Agr.* 7, 36–38 (in Chinese).
76. Huang, M., Wang, Z., Luo, L., Wang, S., Bao, M., He, G., Cao, H., Diao, C., Li, S., 2017. Effects of ridge mulching with side-dressing on grain yield, protein content and water use efficiency in dryland wheat. *Acta Agron Sin.* 43, 899–911 (in Chinese).
77. Hui, X., Wang, Z., Luo, L., Ma, Q., Wang, S., Dai, J., Jin, J., 2017. Winter wheat grain yield and Zn concentration affected by long-term N and P application in dryland. *Sci Agric Sin.* 50, 3175–3185 (in Chinese).
78. Jia, L., Zhai, B., 2017. Effects of different optimized water and fertilizer modes on yield, water-nitrogen use efficiency of winter wheat in Weibei Dry Plateau Area. *Acta Agr. Boreali. Sin.* 26, 1768–1775 (in Chinese).
79. Jiang, J., Yan, S., Pan, S., Yang, H., Zhai, Y., 1988. Effects of cultivars and cultural measures on the grain yield and quality of dry land wheat. *J Beijing Univ Agric.* 3, 149–157 (in Chinese).
80. Jin, J., Wang, Z., Dai, J., Wang, S., Gao, Y., Cao, H., Yu, R., 2014. Effects of long-term N and P fertilization with different rates on Zn concentration in grain of winter wheat. *Plant Nutr Fer Sci.* 20, 1358–1367 (in Chinese).
81. Jin, K., Cornelis, W.M., Schiettecatte, W., Lu, J., Yao, Y., Wu, H., Gabriels, D., De Neve, S., Cai, D., Jin, J., Hartmann, R., 2007. Effects of different management practices on the soil–water balance and crop yield for improved dryland farming in the Chinese Loess Plateau. *Soil Till. Res.* 96, 131–144.
82. Jing, D., 2016. Influence of different film mulching methods on soil water content, soil temperature and yield of winter wheat in the drought plateau of the eastern Gansu Province. *Agr Res Arid Area.* 34, 218–224 (in Chinese).
83. Kang, H., Zhu, B., Hong, L., Dong, C., 2001. Effects of zero-tillage and mulching on the soil fertility and wheat yield in the arid land. *Shaanxi J Agri. Sci.* 01, 1–3 (in Chinese).
84. Kang, S.Z., Lu, Z., Liang, Y.L., Hu, X., Cai, H., Gu, B., 2002. Effects of limited irrigation on yield and water use efficiency of winter wheat on the Loess Plateau of China. *Agric. Water Manage.* 55, 203–216.
85. Kong, D., Liu, N., Yang, G., Feng, Y., Ren, G., 2009. Effects of topdressing different amount of biogas fertilizer on photosynthesis characteristic and grain yield in winter wheat of semi-arid area of China. *Acta Agr. Boreali-Sin.* 18, 117–122 (in Chinese).
86. Lan, X., Huang, C., Li, B., Li, S., Song, Y., Chai, Y., Cehn, H., Chang, L., Chai, S., 2016. Effect of different mulching materials on soil temperature and yield of Winter wheat in Northwest Arid Land of China. *J. Trit. Crops.* 36, 1084–1092 (in Chinese).
87. Lei, M., Sun, M., Gao, Z., Wang, P., Ren, A., Xue, L., Yang, Z., 2017. Effects of subsoiling during the fallow period and timely sowing on water storage and wheat yield of dryland. *Sci Agric Sin.* 50, 2904–2915 (in Chinese).
88. Li, B., Yang, C., Lan, X., Song, Y., Li, S., Chang, L., 2017. Effects of bundled straw covering on yield of dryland winter wheat in semiarid region. *Agr Res Arid*

- Area., 35, 14–20 (in Chinese).
89. Li, F., Liu, G., Li, C., Zhu, Y., Zhou, D., Chen, Q., Shan, X., 2013. Effects of whole film mulching with soil covering and bunch planting on soil water in field of dry-land wheat. *Agr Res Arid Area.*, 31, 73–78 (in Chinese).
  90. Li, F., Zhao, S., 1995. Preliminary study on limited irrigation for spring wheat field in semi-arid region of loess plateau. *Chin. J. Appl. Ecol.*, 6, 259–264 (in Chinese).
  91. Li, F.M., Song, Q.H., Liu, H.S., Li, F.R., Liu, X.L., 2007. Effects of pre-sowing irrigation and phosphorus application on water use and yield of spring wheat under semi-arid conditions. *Agric. Water Manage.* 49, 173–183.
  92. Li, F. M., Wang, P., Wang, J., Xu, J. Z., 2004. Effects of irrigation before sowing and plastic film mulching on yield and water uptake of spring wheat in semiarid Loess Plateau of China. *Agric. Water Manage.* 67, 77–88.
  93. Li, G., Huang, G., 2010. Determination of the effect of precipitation distribution on yield of wheat and pea in dryland using APSIM. *Chin. J. Eco–Agr.* 18, 342–347 (in Chinese).
  94. Li, G., Shi, Y., 2012. Effect of subsoiling tillage and ploughing tillage on the root senescence after anthesis and yield of wheat in dry-land. *J. Trit. Crops.* 32(3), 500–502 (in Chinese).
  95. Li, J., Liu, D., Jiang, D., 1996. Study on increasing yield of Winter Wheat with drought resistance by adding MS resistance agent. *J. Trit. Crops.* 4, 18–20 (in Chinese).
  96. Li, L., Huang, G., Zhang, R., Cai, L., Luo, Z., Jin, X., Zhang, E., Bellotti, B., Unkovich, M., 2011. Effects of Lucerne removal time on soil water and productivity in a Lucerne-wheat rotation on the Western Loess Plateau. *Acta Agron Sin.* 37, 686–693 (in Chinese).
  97. Li, M., Wang, Z., Wang, J., Mao, H., Dai, J., Li, Q., Zou, C., 2013. Effect of Zn application methods on wheat grain yield and Zn utilization in Zn-deficient soils of dryland. *Plant Nutr Fer Sci.* 19, 1346–1355 (in Chinese).
  98. Li, M., Yu, R., Yang, Y., Wang, Z., 2016. Effects of soil moisture on wheat grain yield and zinc utilization in zinc-deficient dryland soil. *Plant Nutr Fer Sci.* 22, 388–394 (in Chinese).
  99. Li, N., Zhou, C., Sun, X., Jing, J., Tian, X., Wang, L., 2018. Effects of ridge tillage and mulching on water availability, grain yield, and water use efficiency in rain-fed winter wheat under different rainfall and nitrogen conditions. *Soil Till. Res.* 179, 86–95.
  100. Li, Q., Gao, Z., Sun, M., Zhao, W., Deng, Y., Deng, L., 2011. Effect of mulching and fertilizer application in summer fallow period on yield and soil water use of winter wheat in dryland. *J. Trit. Crops.* 31, 519–523 (in Chinese).
  101. Li, S., Wang, F., Si, J., Kong, L., Zhang, B., Feng, B., 2009. Association between morphological and physiological traits and water use efficiency in wheat (*Triticum aestivum* L.) under no-tillage and rainfed conditions. *J. Trit. Crops.* 29, 855–858 (in Chinese).
  102. Li, T., Xie, Y., Hong, J., Feng, Q., Sun, C., Wang, Z., 2013. Effects of phosphorus application rates on winter wheat yield and phosphorus use efficiency in drylands

- of South Shanxi Province. *Chin. J. Eco-Agr.* 21, 658–665 (in Chinese).
103. Li, T., Xie, Y., Ren, M., Deng, S., Shan, J., Lei, Z., Hong, J., Wang, Z., 2011. Effects of fertilization and plastic film mulched ridge-furrow cultivation on yield and water and nitrogen utilization of winter wheat on dryland. *Acta Ecol Sin.* 31, 212–220 (in Chinese).
  104. Li, X.Y., 2003. Gravel–sand mulch for soil and water conservation in the semiarid loess region of northwest China. *Catena*, 52(2), 105–127.
  105. Li, Z., Lv, J., 1991. The method of p fertilizer application to dryland wheat. *Agr Res Arid Area*. 3, 21–28 (in Chinese).
  106. Li, Z., Yang, X., Cui, S., Yang, Q., Yang, X., Li, J., Shen, Y., 2018. Developing sustainable cropping systems by integrating crop rotation with conservation tillage practices on the Loess Plateau, a long-term imperative. *Field Crop Res.* 222, 164–179.
  107. Li, Z.T., Yang, J.Y., Drury, C.F., Hoogenboom, G., 2015. Evaluation of the dssat-csm for simulating yield and soil organic C and N of a long-term maize and wheat rotation experiment in the Loess Plateau of northwestern China. *Agric Syst.* 135, 90–104.
  108. Liang, B., Zhao, W., Yang, X., Zhou, J., 2012. Effects of long-term different fertilization managements on changes of N in soil and its uptake by wheat on dryland. *Sci Agric Sin.* 45, 885–892 (in Chinese).
  109. Liao, Y., Han, S., Wen, X., 2002. Soil water content and crop yield effects of mechanized conservative tillage-cultivation system for dryland winter wheat in the loess tableland. *Transactions of CSAE* 18, 68–71 (in Chinese)
  110. Liao, Y., Han, S., Wen, X., 2002. Study on characteristics of soil moisture and its use efficiency in dryland wheat in the loess tableland. *Chin. J. Eco-Agr.* 10, 55–58 (in Chinese)
  111. Liao, Y., Zheng, J., 1999. Discussion on high yield and high efficiency cultivation mode of dryland wheat in Weibei Plateau. *J. Trit. Crops.* 6, 61–62 (in Chinese).
  112. Liu, H., Zhang, H., Xu, Z., Wang, L., Pei, R., Wang, H., Zhou, W., Guo, Y., 2004. Effect of potassium and manganese fertilizer cooperating application on quality and yield of winter wheat in dryland. *Agr Res Arid Area*. 22, 20–24 (in Chinese).
  113. Liu, J., Dang, Z., Cao, W., Yu, A., 2005. Effect of different mulching and sowing methods on wheat yield and soil water content in Weibei Dryland. *J. Trit. Crops.* 25, 91–94 (in Chinese).
  114. Liu, M., Dan, Y., 1994. Analysis on limiting factors of dry land wheat production in Heilongjiang Province, Hebei Province. *Chin. J. Eco-Agr.* 2, 81–84 (in Chinese).
  115. Liu, S., Zhang, J., Liu, G., 2015. Mechanismic study on highly efficient fertilization utilizing the technique of full plastic-film mulching overlying soil and bunch planting method for dry-land wheat. *Agr Res Arid Area.*, 33(3), 177–183 (in Chinese).
  116. Liu, T., Tian, X., Chen, H., Li, J., You, D., Wang, Z., 2012. Effect of ridge-furrow cultivation pattern on soil hydro-thermal condition and winter wheat development in Weibei Highland. *Acta Agr. Boreali. Sin.* 21, 71–78 (in Chinese).
  117. Liu, W., Zhang, J., Cao, W., Dang, Z., Qiang, Q., Gao, Y., Li., 2006. Effects of



- different wheat cultivation methods on soil moisture use-efficiency in dryland soil. *Acta Agr. Boreali Sin.* 15, 47–51 (in Chinese).
- 118.Liu, Y., Lin, Q., Fang, Q., 2013. Effects of dryland with straw return on photosynthetic characteristics and yield of wheat after flowering stage. *Acta Agr. Boreali-Sin.* 28, 110–114 (in Chinese).
  - 119.Liu, Z., Chen, Z., Ma, P., Meng, Y., Zhou, J., 2017. Effects of tillage, mulching and n management on yield, water productivity, N uptake and residual soil nitrate in a long-term wheat-summer maize cropping system. *Field Crop Res.* 213, 154–164.
  - 120.Luo, W., Song, S., 2012. Study on the effect of the cropping of Huaichuan 916 wheat in upland. *Mod Agric Sci Technol*, 21, 36–37 (in Chinese).
  - 121.Lv, J., Yao, Y., Zhang, J., Wang, Y., Li, J., Ding, Z., Wu, J., Yu, X., 2011. Effects of different tillage measures on soil environment and wheat yield in slopping dryland. *J. Henan. Agr. Sci.* 40, 41–44 (in Chinese).
  - 122.Lv, S., Li, S., 2005. Effects of PP333 spraying on some physiological, morphological characteristics and yield of wheat on dryland with different plant density. *Plant Nutr Fer Sci.* 11, 92–98 (in Chinese).
  - 123.Lv, Z., Liu, X., Cao, W., Zhu, Y., 2013. Climate change impacts on regional winter wheat production in main wheat production regions of china. *Agr Forest Meteorol.* 171–172, 234–248.
  - 124.Ma, C., Liu, Y., Liang, L., Zhai, B., Zhang, H., Wang, Z., 2018. Effects of combined application of chemical fertilizer and organic manure on wheat yield and leaching of residual nitrate-N in dryland soil. *Chin. J. Appl. Ecol.* 29, 1240–1248 (in Chinese).
  - 125.Ma, H., Hao, M., Guo, H., Su, F., Niu, Y., 2016. Effects of different mulching treatments on yield and water use efficiency of winter wheat in Weibei Highland. *Agr Res Arid Area.*, 34, 51–57 (in Chinese).
  - 126.Ma, H., Wang, X., Fan, G., Wu, Z., Li, J., 2015. Effect of density on population quality, yield and border effect of stripplanting wheat in Sichuan hilly Areas. *J. Trit. Crops.* 35, 1551–1557 (in Chinese).
  - 127.Ma, S.C., Xu, B.C., Li, F.M., Liu, W.Z., Huang, Z.B., 2008. Effects of root pruning on competitive ability and water use efficiency in winter wheat. *Field Crop Res.*, 105, 56–63.
  - 128.Ma, X., Wang, Z., Cao, H., She, X., He, H., Bao, M., Song, Q., Liu, J., 2017. Yield variation of winter wheat and its relation to yield components, NPK uptake and utilization in drylands of the Loess Plateau. *Plant Nutr Fer Sci.* 23, 1135–1145 (in Chinese).
  - 129.Man, X., Yu, H., Wang, Z., Cao, H., He, H., He, G., Wang, S., Huang, M., Liu, L., 2016. Yield variation of winter wheat and its relation to cultivation, fertilization, and main soil fertility factors. *Sci Agric Sin.* 49, 4757–4771 (in Chinese).
  - 130.Meng, X., Wang, Z., Li, F., Li, K., Xue, C., Li, S., 2012. Effects of soil moisture before sowing and nitrogen fertilization on winter wheat yield and water use on Weibei Plain of Loess Plateau. *Chin. J. Appl. Ecol.* 23, 369–375 (in Chinese).
  - 131.Meng, X., Wang, Z., Yang, N., Yang, R., Zhang, Z., Zhao, H., 2011. Effects of soil moisture before sowing and phosphorus fertilization on winter wheat yield, water

- and fertilizer use efficiencies on Weibei Tableland of the Loess Plateau. *Plant Nutr Fer Sci.* 17, 1083–1090 (in Chinese).
132. Miao, G., Gao, Z., Yin, J., Zhou, N., Adams, W.A., 2004. Physical property and yearly moving pattern of soil water on the arid wheat land of hilly region in jinnan. *Acta Agron Sin.* 30(7), 644–650 (in Chinese).
  133. Miao, G., Zhang, Y., Yin, J., Hou, Y., Pan, X., 1989. A study on the development of root system in winter wheat under unirrigated conditions in Semi-arid Loess Plateau. *Acta Agron Sin.* 15, 104–115 (in Chinese).
  134. Miao, L., Wang, L., Huang, G., Luo, Z., Li, D., 2009. Effects of conservation tillage on soil enzymatic activities in rainfed wheat field. *Agr Res Arid Area.* 27, 6–11 (in Chinese).
  135. Miao, Y., Li, S., Fu, Y., Wang, Z., Xu, X., Luo, L., 2014. Characteristics of ammonium N and nitrate N accumulation in dryland soil in relation with wheat yield. *Chin. J. Appl. Ecol.* 25, 1013–1021 (in Chinese).
  136. Pei, X., Dang, J., Zhang, D., Wang, J., Zhang, J., Dong, F., 2017. Impact of sowing date on yield and water use efficiency of wheat in different precipitation years in dryland of South Shanxi. *Chin. J. Eco-Agr.* 25, 553–562 (in Chinese).
  137. Pei, X., Dang, J., Zhang, D., Zhang, J., Wang, J., Chen, M., Wu, X., 2018. Effects of deep plowing time during fallow period and fertilization method on yield, water and nutrition use efficiency of dryland wheat in different precipitation years in South Shanxi. *J. Trit. Crops.* 38, 330–339 (in Chinese).
  138. Qiao, R., Gao, Y., Wei, Y., Ning, D., Wang, L., 1998. Effect and cause analysis of yield increasing in film mulching cultivation in dry land of Lin Feng 116. *J. Trit. Crops.* 4, 48–51 (in Chinese).
  139. Qu, C., Liu, J., Hu, C., Ding, M., Zhang, S., 2015. Influence of nitrogen application on physiological traits of wheat flag leaf under straw mulching on dryland. *J. Trit. Crops.* 35, 207–214.
  140. Qu, H., Zhao, H., Liu, J., Huang, H., Wang, Z., Zhai, B., 2017. NPK requirements and their physiological efficiencies for winter wheat under different cover measures in dryland. *Plant Nutr Fer Sci.* 23, 874–882 (in Chinese).
  141. Ren, A., Sun, M., Wang, P., Xue, L., Lei, M., Xue, J., Gao, Z., 2017. Effects of sub-soiling in fallow period and phosphorus fertilizer on yield and water use efficiency in dry-land wheat. *Sci Agric Sin.* 50, 3678–3689 (in Chinese).
  142. Ren, X., Cai, T., Chen, X., Zhang, P., Jia, Z. 2016. Effect of rainfall concentration with different ridge widths on winter wheat production under semiarid climate. *Eur J. Agron.* 77, 20–27.
  143. Sang, C., Liu, S., Wang, P., 2009. Effects of organic and chemical fertilization on spring wheat nutrient uptake and yield components in Hemi-dry-land. *Acta Agr. Boreali. Sin.* 18, 97–102 (in Chinese).
  144. Shao, Y., Xie, Y., Wang, C., Yue, J., Yao, Y., Li, X., et al. (2016). Effects of different soil conservation tillage approaches on soil nutrients, water use and wheat-maize yield in rainfed dry-land regions of north china. *Eur. J. Agron.* 81, 37–45.
  145. Shi, G., Wei, L., Chen, M., Fu, G., Dai, W., Li, Y., 2000. A path analysis of relative yield characters of winter wheat in dryland under simulated rainfall conditions. *Agr*

- Res Arid Area., 18, 64–69 (in Chinese).
146. Shi, J., Lei, Z., 2017. Effects of fertilization on yield and fertilization use efficiency of winter wheat in arid zone in Loess Plateau of eastern Gansu province. *Agr Res Arid Area.*, 35, 147–151 (in Chinese).
  147. Shi, Y., Wei, D., Yu, Z., Yu, S., 2000. Changes of abscisic acid and IPAs content in two kinds of dry land high yield wheat varieties during anthesis senescence. *Plant Physiology Communications*, 36, 417–419 (in Chinese).
  148. Shi, Y., Wei, D., Yu, Z., Yu, S., 2000. Effects of deep cultivation root cutting on senescence of root system. *Chin. J. App. Environ. Bio.* 6, 516–519 (in Chinese).
  149. Shi, Y., Wei, D., Yu, Z., Yu, S., 2001. Effects of fertilizer application depth on nitrogen utilization and yield in dry land wheat. *J Nucl Agric Sci.* 15, 180–183 (in Chinese).
  150. Shi, Y., Wei, D., Yu, Z., Yu, S., 2002. Effects of deep cultivation-root cutting on nitrogen distribution and utilization and yield in dry land wheat of high yield. *J Nucl Agric Sci.* 16, 224–227 (in Chinese).
  151. Shi, Y., Yu, Z., 2000. Effects of deep cultivation root cutting on the senescence of flag leaf after anthesis and yield in dry land wheat production. *J. Trit. Crops.* 20(3) 67–69 (in Chinese).
  152. Shi, Y., Yu, Z., Wei, D., Yu, S., 1999. Effects of fertilizer application depth on senescence of flag leaf after anthesis and yield in dry land wheat. *Acta Agr Boreali Sin* 19, 139–142 (in Chinese).
  153. Shi, Y., Yu, Z., Wei, D., Yu, S., 1999. Effects of fertilizer application depth on senescence of flag leaf after anthesis and yield in dry land wheat. *Acta Agr Boreali Sin.* 19, 139–142 (in Chinese).
  154. Song, T., Wang, H., Chen, N., Zahng, X., 2014. Regulation of whole field soil-plastic mulching with bunch planting and whole field sand mulching with flat planting on soil moisture and yield of spring wheat in semiarid dryland areas. *Chin. J. Eco–Agr.* 22, 1174–1181 (in Chinese).
  155. Song, Y., Yang, C., Li, B., Li, S., Lan, X., Chang, L., 2016. Effect of bundled straw mulching on yield of winter wheat and soil moisture in arid region. *J. Trit. Crops.* 36, 765–772 (in Chinese).
  156. Su, Z., Zhang, J., Wu, W., Cai, D., Lv, J., Jiang, G., et al. (2007). Effects of conservation tillage practices on winter wheat water-use efficiency and crop yield on the loess plateau, china. *Agr. Water Manage.* 87, 307–314.
  157. Sun, H., Shen, Y., Qiang, Y., Flerchinger, G.N., Zhang, Y., Liu, C., Zhang, X., 2010. Effect of precipitation change on water balance and WUE of the winter wheat–summer maize rotation in the North China Plain. *Agric. Water Manage.* 97, 1139–1145.
  158. Sun, J., Wang, Y., 2001. Effect of straw cover on wheat yield and soil environment in dry land field. *Transactions of the CSAE.* 17, 53–55 (in Chinese).
  159. Sun, L., Wang, S., Zhang, Y., Li, J., Wang, X., & Wang, R., Lyu, W., Chen, N., Wang, Q., 2018. Conservation agriculture based on crop rotation and tillage in the semi-arid Loess plateau, China: effects on crop yield and soil water use. *Agric. Ecosyst. Environ.* 251, 67–77.

160. Sun, M., Ge, X., Gao, Z., Ren, A., Deng, Y., Zhao, W., Zhao, H., 2014. Relationship between water storage conservation in fallow period and grains protein formation in dryland wheat in different precipitation years. *Sci Agric Sin.* 47, 1692–1704 (in Chinese).
161. Sun, M., Wen, F., Gao, Z., Ren, A., Deng, Y., Zhao, W., Zhao, H., Yang, Z., Hao, X., Miao, G., 2014. Effects of farming practice during fallow period on soil water storage and yield of dryland wheat in different rainfall years. *Acta Agron Sin.* 40, 1459–1469 (in Chinese).
162. Sun, X., Lin, Q., Li, L., Zhao, C., Liu, Y., 2010. Effect of supplementary irrigation on the nitrogen metabolism at later developing stages and yield of high-yield wheat in dry land. *J. Trit. Crops.* 30(1), 106–110 (in Chinese).
163. Sun, Z., Qu, H., Chong, H., Ji, P., Zhang, Z., Yi, S., 1991. Study on the effect of mulching and fertilization of winter wheat in hilly areas. *Agr Res Arid Area.* 4, 46–52 (in Chinese).
164. Tan, K., Yang, C., Chai, S., Chang, L., Cheng, H., Huang, C., Wang, Y., 2015. Effect of mulching film after straw returning on soil temperature and grain yield of dryland winter wheat. *Agr Res Arid Area.*, 33, 159–164 (in Chinese).
165. Tan, N., Lin, Q., Jiang, W., Liu, Y., Li, L., 2011. Effect of limited irrigation on diurnal variation in flag-leaf photosynthesis and yield of dryland wheat. *Chin. J. Eco-Agr.* 19, 805–811 (in Chinese).
166. Tan, N., Lin, Q., Li, L., Liu, Y., Zhang, Y., 2010. Effects of limited irrigation on light-response of flag leaves and grain yield in dry-land winter wheat at filling stage. *Acta Agr. Boreali-Sin.* 25, 145–151 (in Chinese).
167. Tang, Y., Li, C., Wu, C., Wu, X., Huang, G., Ma, X., 2013. Effects of sowing patterns on establishment quality, grain yield and production benefit of intercropping wheat in hilly countries. *Sci Agric Sin.* 46, 5089–5097 (in Chinese).
168. Tian, X., Gao, C., Zhang, E., Song, J., Wang, S., 1998. Experiment on rainfed winter wheat cultivation techniques of mulched furrow and hole seedings in mountain areas. *Agr Res Arid Area.* 1, 31–35 (in Chinese).
169. Wang, B., Liu, W., Dang, T., Gao, C., Chen, J., Gan, Z., 2008. Effect of long-term fertilization on winter wheat water utilization in rain-fed farmland of the Loess Tableland. *Plant Nutr Fer Sci.* 14, 829–834 (in Chinese).
170. Wang, D., Feng, H., Liu, X., Li, Y., Zhou, L., Zhang, A., Dyck, M., 2018. Effects of gravel mulching on yield and multilevel water use efficiency of wheat-maize cropping system in semi-arid region of Northwest China. *Field Crop Res.* 218, 201–212.
171. Wang, F., Chen, H., Li, R., Chai, Y., Chen, Y., Chang, L., Huang, C., Chai, S., 2017. Effect of bundled straw covering on soil temperature and yield of winter wheat in arid region. *J. Trit. Crops.* 37, 777–785 (in Chinese).
172. Wang, G., Hao, M., Xu, J., Hong, J., 2011. Effect of conservation tillage on wheat yield and soil physicochemical properties in the south of Loess Plateau. *Plant Nutr Fer Sci.* 17, 539–544 (in Chinese).
173. Wang, H., Song, S., Zhang, X., Gao, S., Yu, X., Ma, Y., 2013. Effects of using plastic film as mulch combined with bunch planting on soil temperature, moisture

- and yield of spring wheat in a semi-arid area in drylands of Gansu, China. *Acta Ecol Sin.* 33, 5580–5588 (in Chinese).
174. Wang, H., Yu, Z., Zhang, Y., Shi, Y., Wang, D., 2012. Effects of tillage regimes on water consumption and dry matter accumulation in dryland wheat. *Acta Agron Sin.* 38, 675–682 (in Chinese).
  175. Wang, J., Li, F., Li, H., Liu, A., Zhao, G., Fan, G., 2005. Path analysis between yield and yield components on dry-land winter wheat variety of the huang-huai region. *Chin. Agr. Sci. Bull.* 21, 142–143 (in Chinese).
  176. Wang, J., Li, F., Song, Q., Li, S., 2003. Effects of plastic film mulching on soil temperature and moisture and on yield formation of spring wheat. *Chin. J. Appl. Ecol.* 14, 205–210 (in Chinese).
  177. Wang, J., Lin, Q., Ni, Y., Liu, Y., Wang, B., 2009. Effect of conservation tillage on photosynthetic characteristics and yield of winter wheat in dry land. *J. Trit. Crops.* 29, 480–483 (in Chinese).
  178. Wang, J., Mao, H., Zhao, H., Huang, D., Wang, Z., 2012. Different increases in maize and wheat grain zinc concentrations caused by soil and foliar applications of zinc in Loess Plateau, China. *Field Crop Res.* 135, 89–96.
  179. Wang, J., Yan, C., Liu, E., Chen, B., Zhang, H., 2015. Effects of long-term no-tillage with straw mulch on photosynthetic characteristics of flag leaves and dry matter accumulation and translocation of winter wheat in dryland. *Plant Nutr Fer Sci.* 21, 296–305 (in Chinese).
  180. Wang, L., Li, G., 1998. Effects of stillage on dryland soil and wheat yield. *Agr Res Arid Area.* 2, 69–74 (in Chinese).
  181. Wang, Q., Xu, J., Fan, G., Zheng, W., Hu, W., Wang, S., 2016. Effect of nitrogen strategies on dry matter accumulation and yield of wheat in sichuan hilly areas based on " Three Combination Structure ". *J. Trit. Crops.* 36, 1369–1376(in Chinese).
  182. Wang, Q.J., Chen, H., Li, H.W., Li, W.Y., Wang, X.Y., Mchugh, A.D., He, J., Gao, H., 2009. Controlled traffic farming with no tillage for improved fallow water storage and crop yield on the Chinese Loess plateau. *Soil Till. Res.* 104, 192–197.
  183. Wang, W., Zhang, J., 1995. The effect of N fertilizer application upon winter wheat yields and qualities in rainfed farmland. *Agr. Res. Arid Area.* 2, 41–44 (in Chinese).
  184. Wang, X., Tian, X., Chen, Z., Chen, H., Wang, Z., 2009. Effects of mulching and fertilization on winter wheat field soil moisture in dry highland region of Loess Plateau. *Chin. J. Appl. Ecol.* 20, 1105–1111 (in Chinese).
  185. Wang, X., Wang, Q., Fan, J., Fu, Q., 2013. Evaluation of the AquaCrop model for simulating the impact of water deficits and different irrigation regimes on the biomass and yield of winter wheat grown on China's Loess Plateau. *Agric. Water Manage.* 129, 95–104
  186. Wang, Y., 2003. Effect of soil stored water before sowing on yield of winter wheat mulched with plastic film in dryland. *Chin. J. Eco-Agr.* 11, 117–120 (in Chinese).
  187. Wang, Y., Fan, T., 1998. A study on yield increasing mechanisms of winter wheat mulching with plastic film in dry land areas. *Acta Agr. Boreali. Sin.* 7, 43–48 (in Chinese).

188. Wang, Y., Gao, H., 1999. Study on water use efficiency of winter wheat Shaan 229 in different fertilization levels in dryland. *Agr Res Arid Area*. 17, 35–39 (in Chinese).
189. Wang, Y., Li, J., 2014. Study of tillage patterns suitable for soil physicochemical properties and crop yields in wheat/maize fields. *Plant Nutr Fer Sci*. 20, 1139–1150 (in Chinese).
190. Wang, Y., Wang, L., Fan, T., Cui, J., 2000. Yield effects of collecting rainwater and water-saving irrigation on film-mulched winter wheat and corn in dryland in different years. *Res. agric modern*. 21, 304–308 (in Chinese).
191. Wang, Z., Liang, Y., Liu, W., Pei, X., Jia, C., Jia, Z., 2009. Effect of spraying FA on yield and growth period of winter wheat. *Agr Res Arid Area*. 27, 68–72 (in Chinese).
192. Wei, T., Dong, Z., Zhang, C., Ali, S., Chen, X., Han, Q., Zhang, F., Jai, Z., Zhang, P., Ren, X., 2018. Effects of rainwater harvesting planting combined with deficiency irrigation on soil water use efficiency and winter wheat (*Triticum aestivum*, L.) yield in a semiarid area. *Field Crop Res*. 218, 231–242.
193. Wen, F., Sun, M., Deng, L., Zhao, W., Gao, Z., 2013. Effect of deep-plow and mulching during fallow period on soil water and wheat water use efficiency in dryland. *Chin. J. Eco-Agr*. 21, 1358–1364 (in Chinese).
194. Wen, H., Zhang, L., Li, S., Hou, L., You, X., Yao, H., Li, Z., Zhang, Z., Li, X., 2001. Analysis of yield forming factors of wheat in Arid Land in Shanxi. 29, 5–10 (in Chinese).
195. Wen, X., He, L., 2000. Yield increasing mechanism of micro watergathering in wheat in dry land of Weibei Plateau. *J. Trit. Crops*. 20, 51–54 (in Chinese).
196. Wu, B., Gao, Y., Li, Y., Niu, J., Cui, H., Liu, H., Nan, B., 2018. Influences of different plastic film mulches on soil temperature and grain yield of spring wheat in Northwest Arid Land of China. *Acta Agr Boreali Sin*. 5, 741–749 (in Chinese).
197. Wu, D., Li, H., Jiao, X., Zhou, H., 2001. Relationship between water and fertilizer for wheat and effect on wheat yield in rainfed field of Loess Plateau. *Transactions of the CSAE* 17, 39–42 (in Chinese).
198. Wu, J., Zhu, H., Yang, Z., 2003. Study on water and fertilizer use efficiency of wheat under different water and fertilizer conditions. *Acta Agr Boreali Sin*. 18, 95–98 (in Chinese).
199. Wu, T., Wang, S., Deng, J., Jin, S., Cui, M., Zhang, X., 1995. Simulation of effects of nitrogen applying in different rainfall on dryland winter wheat in longdong. *Acta Agr Boreali Sin*. 4, 69–72 (in Chinese).
200. Wu, X., Tang, Y., Li, C., Wu, C., Huang, G., 2015. Effects of autumn straw mulching on physiological characteristics and water use efficiency in winter wheat grown in hilly drought region. *Acta Agron Sin*. 41, 929–937 (in Chinese).
201. Xia, G., Yan, Y., Chen, S., Gao, S., Luo, Y., 2002. Study on the effect of mulching and fertilization of winter wheat in hilly areas. *Agr Res Arid Area*. 1, 18–21, 25 (in Chinese).
202. Xie, Y., Li, T., Hong, J., Liu, L., Pang, J., Feng, Q., Deng, S., Shan, J., 2011. Effects of nitrogen application and ridge film furrow planting on water use of winter wheat

- in dry land of South Shanxi. Chin. J. Appl. Ecol. 22, 2038–2044 (in Chinese).
203. Xu, F., Yan, J., Gao, Y., 2000. Effect of soil moisture conservation cultivation and fertilization combination on wheat yield. J. Trit. Crops. 20, 54–59 (in Chinese).
  204. Xu, Y., Shen, Y., Li, S., 2011. Effect of elevated CO<sub>2</sub> concentration and nitrogen application on translocation of dry matter and nitrogen restored before anthesis in winter wheat. Acta Agron Sin. 37, 1465–1474 (in Chinese).
  205. Xu, Z., Zhang, M., Miao, Y., 1993. A study of mulching cultivation with green manure crops and wheat in rotation over the Loess Plateau. Agr Res Arid Area. 1, 1–8 (in Chinese).
  206. Xue, C., Wang, Z., Li, F., Zhao, F., Zhou, L., Li, X., 2011. Effects of different fertilization and mulching cultivation methods on yield and soil water use of winter wheat on Weibei Dryland. Sci Agric Sin. 44, 4395–4405 (in Chinese).
  207. Xue, L., Sun, M., Gao, Z., Wang, P., Ren, A., Lei, M., Yang, Z., 2017. Effects of incremental seeding rate under sub-soiling during the fallow period on nitrogen absorption and utilization, yield and grain protein content in dryland wheat. Sci Agric Sin. 50, 2451–2462 (in Chinese).
  208. Xue, N.W., Xue, J.F., Yang, Z.P., Sun, M., Ren, A.X., Gao, Z.Q., 2017. Effects of film mulching regime on soil water status and grain yield of rain-fed winter wheat on the Loess Plateau of China. J. Integr. Agric. 16, 2612–2622.
  209. Xue, S., Wu, X., Feng, C., Zhang, Q., 1997. Effects of N fertilizer on the amount of the chlorophyll and carbohydrate in dryland wheat leaf and the relationship between N fertilizer and wheat yield. Agr Res Arid Area. 1, 79–84 (in Chinese).
  210. Yan, C., 2002. The yield-improving effects of black fluid-film mulched over winter wheat in dry land. J. Shanxi Agric Sci. 30, 7–9 (in Chinese).
  211. Yan, J., Kang, Y., Tian, Z., 2011. Effects of tillage depth on winter wheat growth and water use in dry land. J Henan Agr Sci. 40, 81–83 (in Chinese).
  212. Yan, J., Kang, Y., Tian, Z., 2011. Effects of tillage depth on winter wheat growth and water use in dry land. J. Henan Agr. Sci. 40, 81–83 (in Chinese).
  213. Yang, C., Cai, S., Chang, L., 2015. Influences of different plastic film mulches on soil water use and yield of winter wheat in semiarid rain-fed region. Acta Ecol Sin. 35, 2676–2685 (in Chinese).
  214. Yang, C., Hou, J., Song, Z., Han, Y., Li, X., 2008. Stability analysis of wheat yield on dry land. Shandong Agric. Sci. 7, 38–40 (in Chinese).
  215. Yang, J., Gong, Y., Wang, J., Li, S., 2005. Effects of film mulching on dry matter accumulation and transportation characteristics of wheat in dryland area. J. Trit. Crops. 25, 96–99 (in Chinese).
  216. Yang, J., Gong, Y., Wang, J., Lv, J., Li, S., 2007. The effects of film-mulching on the translocation and distribution in 14c-assimilates after anthesis in winter wheat (*Triticum aestivum* L.) on dryland. J Nucl Agric Sci. 21, 70–74 (in Chinese).
  217. Yang, N., Wang, Z., Gao, Y., Zhao, H., Li, K., Li, F., S. Malhica, S., 2014. Effects of planting soybean in summer fallow on wheat grain yield, total N and Zn in grain and available n and Zn in soil on the Loess Plateau of China. Eur. J. Agron. 58, 63–72.
  218. Yang, N., Zhao, H., Wang, Z., Zhang, D., Gao, y., 2012. Accumulation and

- translocation of dry matter and nutrients of wheat rotated with legumes and its relation to grain yield in a dryland area. *Acta Ecol Sin.* 32, 4827–4835 (in Chinese).
219. Yang, Q., Li, Y., Wang, W., Qi, Y., Cai, A., Han, J., 2011. Influence of zinc fertilizer on the photosynthetic and senescent characteristic of flag leaf of winter wheat on dry land. *J. Trit. Crops.* 31, 133–138 (in Chinese).
  220. Yang, S., Du, S., 1998. Relationship between yield and water, nitrogen and phosphorus of winter wheat in dry land under saturated -D design. *J. Trit. Crops.* 1, 60–62 (in Chinese).
  221. Yang, X., Hao, M., Li, L., Dong, X., 2013. Effects of mulching modes on nutrient uptake and water use of winter wheat in dryland of loess region. *J. Trit. Crops.* 33, 1001–1005 (in Chinese).
  222. Yang, Z., Chen, F., Shi, L., Wen, X., 2013. Responses of photosynthetic characteristics of winter wheat cultivars released in different decades to water deficit in North China Plain. *Acta Agron Sin.* 39, 693–703 (in Chinese).
  223. Yang, Z., Ji, T., Guo, J., Ma, W., Wang, X., 2004. Analysis on high and stable yield ability of dry-land wheat in north part of China. *Agr Res Arid Area.* 22, 70–72 (in Chinese).
  224. Ye, D., Guan, D., Zahng, Y., Zhang, M., Li, Z., 2016. Effect of plant growth regulator on the root growth and yield formation of winter wheat under rain-fed condition. *Acta Agr. Boreali-Sin.* 31, 125–130 (in Chinese).
  225. Yin, M., Tong, Y., Han, W., Hu, T., Gao, P., 2016. Effects of reducing N, straw returning and dicyandiamide application on winter wheat yield and nitrogen budgets in rain-fed region. *Chin. J. Appl. Ecol.* 27, 3593–3599 (in Chinese).
  226. Yu, C., Zhou, J., Tuo, X., Zheng, X., Tang, H., 2007. Effects of plant growth regulators on the growth and yield of winter wheat at different N-application rates on dry land. *Agr Res Arid Area.* 25, 58–62 (in Chinese).
  227. Zhang, A., Cheng, G., Hussain, Q., Zhang, M., Feng, H., Dyck, M., Sun, B., Zhao, Y., Chen, H., Chen, J., Wang, X., 2017. Contrasting effects of straw and straw-derived biochar application on net global warming potential in the Loess Plateau of China. *Field Crop Res.* 205, 45–54.
  228. Zhang, A., Tuo, D., Fan, J., 1998. Studies of fertility and utility of long effect nh 4hco 3 to main crops of dryland farming. *Acta Agr. Boreali-sin* 13, 112–116 (in Chinese).
  229. Zhang, B., Zhang, Z., Qiao, J., Huang, X., Ma, P., Li, J., Cai, D., Xu, W., 1965. Preliminary report on mixed planting of green manure in dryland wheat field. *Acta Agr. Boreali-Sin.* 1, 53–56 (in Chinese).
  230. Zhang, B., Zhu, S., 1999. Physiological characteristics of hybrid wheat in dry land. *J. Trit. Crops.* 19, 49–52 (in Chinese).
  231. Zhang, D., Li, Q., Yao, P., Wang, Z., Zhao, N., Yu, C., Cao, Q., Cao, W., Gao, Y., 2012. Effect of two years incorporation of leguminous green manure during summer fallow period on winter wheat growth and nutrients uptake in dryland. *Acta Agr. Boreali. Sin.* 21, 59–65 (in Chinese).
  232. Zhang, D., Yue, J., Li, X., Wang, H., Shao, Y., Fang, B., Yang, C., Qin, F., Ma, F., Shi, Y., Chen, Y., Chen, H., 2016. Effects of tillage regimes on soil micro-



- environments and yield of winter wheat in rainfed areas in southern Henan province, China. *Transactions of the CSAE* 32, 32–38 (in Chinese).
233. Zhang, F., Zhu, Y., 1992. The primary factor of dryland winter wheat production. *Agr Res Arid Area*. 1, 39–42 (in Chinese).
  234. Zhang, H., Gao, D., 2002. Effect of potassium fertilizer on winter wheat in dryland. *J. Trit. Crops*. 22, 46–49 (in Chinese).
  235. Zhang, H., Liu, H., Maio, Y., Li, Y., Gao, R., 2002. Effect of potassium and manganese fertilizers cooperating application on nutrient uptake and yield of winter wheat in dryland. *Acta Agr. Boreali. Sin.* 11, 63–66 (in Chinese).
  236. Zhang, J., Dang, Y., Fan, T., Zhao, G., Wang, Y., Wang, R., Li, S., 2014. Effect on growth and development, yield and water use efficiency of winter wheat through controlled-release urea base and common urea with split application in Loess Plateau East of Gansu. *J Nucl Agric Sci*. 28, 912–918 (in Chinese).
  237. Zhang, J., Fan, T., Zhao, G., Dang, Y., Wang, L., Li, S., 2017. Yield and water use efficiency of winter wheat in response to long-term application of organic fertilizer from different nitrogen resources replacing partial chemical nitrogen in dry land of Eastern Gansu Province. *Acta Agron Sin.* 43, 1077–1086 (in Chinese).
  238. Zhang, J., Yan, J., Zhang, D., Sun, M., Chang, H., 2017. Evolution rule of wheat varieties in dryland of northern winter wheat zone. *J. Trit. Crops*. 37, 1017–1024 (in Chinese).
  239. Zhang, J., Zhang, D., Wang, L., Mao, P., Zhao, J., 2017. The mechanism of different combinations of organic and N, P fertilizers increasing yield of dryland wheat. *Plant Nutr Fer Sci*. 23, 238–243 (in Chinese).
  240. Zhang, L., 1994. Study on water consumption law of Winter Wheat in Dryland. *J. Agric. Univer. Hebei*. 1, 30–31 (in Chinese).
  241. Zhang, L., Li, G., Su, Z., Cui, Z., Ma, J., 2016. Study on the effects and mode of black plastic mulch and hole seeding cultivation of winter wheat in dryland. *Agr Res Arid Area*. 34, 41–50 (in Chinese).
  242. Zhang, M., Gao, Z., Li, G., Zhao, H., Ren, A., Sun, M., 2014. Effects of different nitrogen and phosphorus fertilizer on the nitrogen accumulation and distribution, yield of dryland wheat under no-tillage and film mulching. *J. Trit. Crops*. 34, 364–371 (in Chinese).
  243. Zhang, M., Sun, M., Gao, Z., Zhao, H., Li, G., Ren, A., Hao, X., Yang, Z., 2016. Relationships of water conservation through mulching in fallow period with wheat nitrogen transportation and crop yield in dryland. *Chin. J. Appl. Ecol.*, 27, 117–124 (in Chinese).
  244. Zhang, R., Hou, Y., Li, F., Sun, X., Wang, Y., Wang, K., Liu, M., Zhang, J., Hou, F., 2017. Effect of sprinkler irrigation on yield and quality of dryland wheat in the north foot of Qinling Mountains. *J. Trit. Crops*. 37, 815–819 (in Chinese).
  245. Zhang, R., Li, F., Wen, J., Li, S., He, J., Wang, Y., Liu, M., 2018. Effect of different fertilization models on yield and benefit of dryland wheat in Weibei Area. *J. Trit. Crops*. 38, 191–195 (in Chinese).
  246. Zhang, S., Lars, L., Tong, Y., 2005. Effects of different field management practices on winter wheat yield and water utilization efficiency in Weibei Loess

- Plateau. Transactions of the CSAE 21, 20–24 (in Chinese).
247. Zhang, S., Liu, J., Li, Q., Feng, Y., Yang, X., Chang, Y., 2014. Analysis of the causes of wheat harvest index reduction under straw mulching on dryland. *Agr Res Arid Area.*, 32, 47–51 (in Chinese).
  248. Zhang, S., Liu, L., Chen, M., Zheng, W., 2002. Cultivation technique of underground irrigation plus narrow -spaced drilling for dryland wheat. *Acta Agr. Boreali-sin.* 17, 40–43 (in Chinese).
  249. Zhang, S., Lövdahl, L., Grip, H., Tong, Y., Yang, X., Wang, Q., 2009. Effects of mulching and catch cropping on soil temperature, soil moisture and wheat yield on the Loess Plateau of China. *Soil Till. Res.* 102, 78–86.
  250. Zhang, X., Shangguan, Z., 2007. Nitrogen regulatory mechanism in leaf membranes superoxidize of different drought resistance ability winter wheat. *Plant Nutr Fer Sci.* 13, 106–112 (in Chinese).
  251. Zhang, Y., Wang, R., Wang, S., Wang, H., Xu, Z., Jia, G., Wang, X., Li, J., 2017. Effects of different sub-soiling frequencies incorporated into no-tillage systems on soil properties and crop yield in dryland wheat-maize rotation system. *Field Crop Res.* 209, 151–158.
  252. Zhang, Y., Zhang, Y., Zhou, H., 2002. Irrigation with rainfall harvesting for spring wheat with plastic-film mulching in semi-arid areas. *Transactions of the CSAE* 18, 68–70 (in Chinese).
  253. Zhang, Z., Liu, F., Zhang, B., Zhang, Z., Li, N., Lv, B., 2016. Interactive effects of fertilizer and planting density on photosynthesis characteristics of flag leaf, yield and quality of Pubing 151. *J. Trit. Crops.* 36, 1069–1075 (in Chinese).
  254. Zhang, Z., Liu, J., Wang, Z., Zhao, H., Yang, N., Yang, R., Cao, H., 2012. Nitrogen recommendation for dryland winter wheat by monitoring nitrate in 1 m soil and based on nitrogen balance. *Plant Nutr Fer Sci.* 18, 1387–1396 (in Chinese).
  255. Zhao, E., Li, L., 1998. The technical system of straw mulching in whole wheat growth periods in dryland farming. *Acta Agr. Boreali Sin.* 7, 86–90 (in Chinese).
  256. Zhao, E., Zhang, L., 1998. Wheat stubble mulching and yield increasing technology in Dryland. *J. Trit. Crops.* 5, 50–51 (in Chinese).
  257. Zhao, H., Gao, Z., Sun, M., Zhao, W., Li, Q., Deng, Y., Yang, Z., 2012, effect of tillage in fallow period on soil water, post-anthesis proline accumulation and grains protein accumulation in dryland wheat. *Sci Agric Sin.*, 45, 4574–4586 (in Chinese).
  258. Zhao, H., Gao, Z., Zhao, W., Deng, L., Sun, M., Deng, Y., 2013. Effect of tillage in fallow period on grain protein and its related enzyme activity in dryland wheat. *J. Trit. Crops.* 33, 331–338 (in Chinese).
  259. Zhao, H., Liang, Z., Qi, H., Wang, Y., Shao, S., Nie, A., 2002. Study on the high-yielding mechanism of film-mulching culture in wheat in dryland field. *Agr Res Arid Area.* 20, 1–4 (in Chinese).
  260. Zhao, H., Liang, Z., Qi, H., Wang, Y., Shao, X., Nie, A., 2002. Effect of irrigation combined with fertilization in different stage of wheat on photosynthetic characteristics and yield in dry land field. *Acta agric. boreali-sin.* 17, 61–65 (in Chinese).
  261. Zhao, J., Zhong, Z., Xue, J., Zhang, X., Liu, H., Wang, Y., Lv, J., 1997. Study on

- cultivation for soil moisture conservation during summer fallow period in dry land of west parts of Henan province. Transactions of the CSAE 13, 76–79 (in Chinese).
262. Zhao, X., Li, T., Xie, Y., Yu, G., Yue, L., Gao, H., Jia, W., 2018. Effect of plastic film mulching on soil water and nitrogen balance in dryland wheat fields. *Acta Ecol Sin.* 38, 1550–1559 (in Chinese).
  263. Zhao, Y., Xie, Y., Hao, M., 2007. Yield effects and soil evolution of long-term application of fertilizer on wheat in dry land of Loess Plateau. *Acta Agr. Boreali. Sin.* 16, 75–79 (in Chinese).
  264. Zheng, X., Zhang, Y., Wang, C., Tuo, X., Zhou, J., 2008. Effects of foliar nutrition of  $\text{KH}_2\text{PO}_3$  Zn and Mn for winter wheat on dry land. *Chin Agr. Sci. Bull.* 24, 263–266 (in Chinese).
  265. Zhou, L. M., Zhang, F., Liu, C.A., 2015. Improved yield by harvesting water with ridges and subgrooves using buried and surface plastic mulches in a semiarid area of China. *Soil Till. Res.* 150, 21–29.
  266. Zhou, L., 1995. Water consumption and water use efficiency of wheat field in fengqiu region. *Chin. J. Appl. Ecol.* 6, 57–61 (in Chinese).
  267. Zhou, L., Lai, X., Yang, Y., Yang, X., Cui, S., Shen, Y., 2018. In search of long-term sustainable tillage and straw mulching practices for a maize-winter wheat-soybean rotation system in the Loess Plateau of China. *Field Crop Res.* 217, 199–210.
  268. Zhou, L., Wang, Z., Li, F., Meng, X., Li, K., Li, S., 2012. Analysis of dry matter accumulation and translocation for winter wheat cultivars with different yields on dryland. *Acta Ecol Sin.* 32, 4123–4131 (in Chinese).
  269. Zhu, Y., Lv, G.C., Chen, Y.L., Gong, X.F., Peng, Y.N., Wang, Z.Y., Ren, A., Xiong, Y.C., 2017. Inoculation of arbuscular mycorrhizal fungi with plastic mulching in rainfed wheat: a promising farming strategy. *Field Crop Res.* 204, 229–241.
